# Supplementary material for: MoMaf1 Mediates Vegetative Growth, Conidiogenesis, and Pathogenicity in the Rice Blast Fungus Magnaporthe oryzae
Source: MDPI journal article supplement (doi:10.3390/jof9010106), 2023-01-12
Supplement: s1 [file s1]

**Table S1. Primers used in this study**

| Primer name   | Sequence (5'-3')                                | Remark                                     |
|---------------|-------------------------------------------------|--------------------------------------------|
| MoMaf1 F1:    | TAAGTCGACCGAACACTCAGTGCGACTCATG                 | amplify <i>MoMAF1</i> 5' flank sequence    |
| MoMaf1 F2:    | TAAGATATC CTGCACTGCAGGCGAGCCTG                  | amplify <i>MoMAF1</i> 5' flank sequence    |
| MoMaf1 F3:    | TAAACTAGT CATCCTTAGTGTGCGCTTTCTGC               | amplify <i>MoMAF1</i> 3' flank sequence    |
| MoMaf1 F4:    | TAAGAGCTC GGAGAACTTTGTGAAGCGCAC                 | amplify <i>MoMAF1</i> 3' flank sequence    |
| MoMaf1 BY:    | CGAATCGATGAAGATGTAC                             | amplify <i>MoMAF1</i> probe sequence       |
| MoMaf1 ConF:  | CCACAGGGCAGGACAAGAAGTTG                         | amplify <i>MoMAF1</i> probe sequence       |
| MoMaf1 ConR:  | CTGGTAGCTGAATACGTTGCAG                          | validation of <i>MoMAF1</i> deletion (HPH) |
| HPH R         | GCTGATCTGACCAGTTGCCTA                           | validation of <i>MoMAF1</i> deletion (HPH) |
| Maf1 Rp27GFP: | TTTCGTAGGAACCCAATCTTCAAATGGTGAGC<br>AAGGGCGAGGA | <i>MoMAF1</i> complementation              |
| Maf1 GFPR:    | CTTGTACAGCTCGTCCATGC                            | <i>MoMAF1</i> complementation              |
| qRTCHS1F      | TCAACGACGAGGAGAAGCC                             | qRT-PCR Primer                             |
| qRTCHS1R      | GTAATCGCAACAGCCAAGA                             | qRT-PCR Primer                             |
| qRTCHS2F      | TCCACGACCTTTGCCATCA                             | qRT-PCR Primer                             |
| qRTCHS2R      | CGCTTTTGCTTCCGCGACT                             | qRT-PCR Primer                             |
| qRTCHS3F      | CGGAAACCAAGGAACAGCG                             | qRT-PCR Primer                             |
| qRTCHS3R      | CAGGGAACAACCAAGAACCAC                           | qRT-PCR Primer                             |
| qRTCHS4F      | TCGAGGGAAAATGTAACGG                             | qRT-PCR Primer                             |
| qRTCHS4R      | TACTGCTGCTGGTGATGGT                             | qRT-PCR Primer                             |
| qRTCHS5F      | CCGTGTTGATGGAGGTTGA                             | qRT-PCR Primer                             |
| qRTCHS5R      | GATCTGGCGGTTCGAGGAAT                            | qRT-PCR Primer                             |
| qRTCHS6F      | GAACGGCAGATTTGATGAC                             | qRT-PCR Primer                             |
| qRTCHS6R      | ACAAGAGTGCTTCGGTGGC                             | qRT-PCR Primer                             |
| qRTCHS7F      | GACATTGAGCTGGAGATTGG                            | qRT-PCR Primer                             |
| qRTCHS7R      | CGCCGCTGTTGCTGTTGTT                             | qRT-PCR Primer                             |
| COS1-QRT-F1:  | CCCTCAGCCCACATACAACT                            | qRT-PCR Primer                             |
| COS1-QRT-F2:  | AGCCTTCGCTCGATACTGAA                            | qRT-PCR Primer                             |
| COM1-QRT-F1:  | ACCGATTCTGACGAATCCAG                            | qRT-PCR Primer                             |
| COM1-QRT-F2:  | CTGGAAGTGTGTCCTCCTC                             | qRT-PCR Primer                             |
| CON7-QRT-F1:  | GCAAGAAGTGCGTTCAAACA                            | qRT-PCR Primer                             |
| CON7-QRT-F2:  | TCTCCACTGCTGCCACTATG                            | qRT-PCR Primer                             |
| CON2-QRT-F1:  | GGAGCCGAAAACATCAACAT                            | qRT-PCR Primer                             |
| CON2-QRT-F2:  | GTTGGTTGGTCCATGCTCTT                            | qRT-PCR Primer                             |
| Hox2-QRT-F1:  | CGATAATTGCTCCCACACCT                            | qRT-PCR Primer                             |
| Hox2-QRT-F2:  | GAAGGAGTCGGTGGTGACAT                            | qRT-PCR Primer                             |
| StuA-QRT-F1:  | CAACATGGGCAGCTCTGATA                            | qRT-PCR Primer                             |
| StuA-QRT-F2:  | CCTGCATGCTTTGTAGCGTA                            | qRT-PCR Primer                             |

---

|                |                                                                |                               |
|----------------|----------------------------------------------------------------|-------------------------------|
| MoMafI GeneF1: | GCATGGACGAGCTGTACAAGATGAAGGTGC<br>GCATACTTTCCCCAG              | <i>MoMAFI</i> complementation |
| MoMafI GeneR1: | CACCACCCCGGTGAACAGCTCCTCGCCCTTG<br>CTCACTCACTCAATCTCCATCTGCGCC | <i>MoMAFI</i> complementation |

---

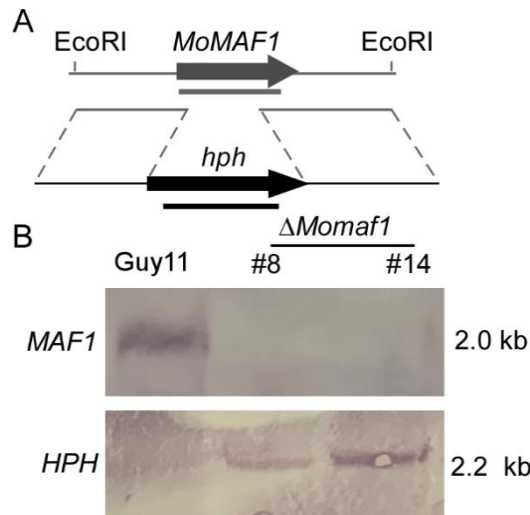

**Figure S1.** Gene knockout strategy and southern blot analyses in *M. oryzae*. (A) *MoMAF1* gene knock out strategy in *M. oryzae* genome. (B) Southern blot analysis of the *MoMAF1* deletion mutants. The genomic DNA of Guy11 and  $\Delta Moma1$  mutants were digested with *EcoRI* and hybridized with *MoMAF1* and *HPH* probe respectively.

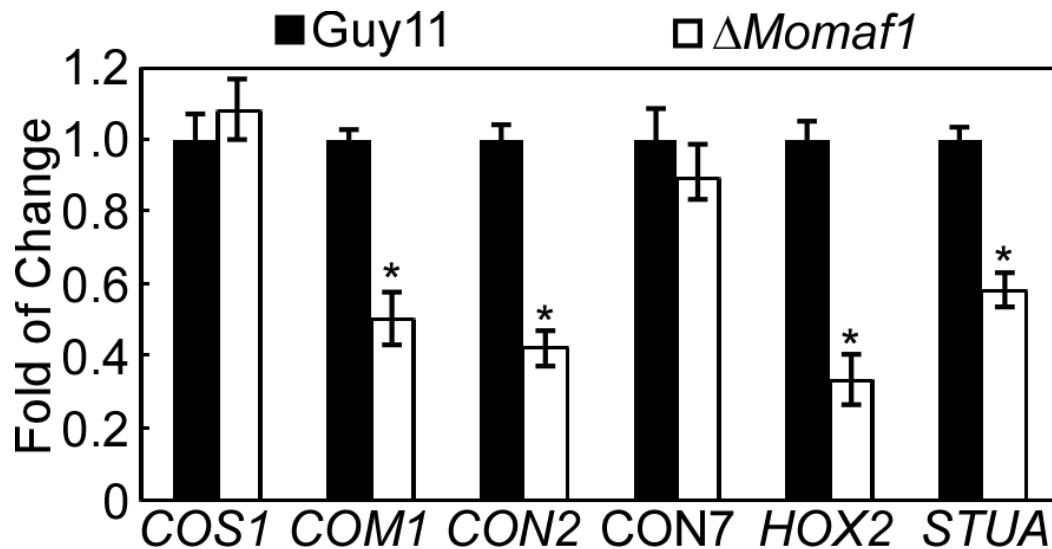

**Figure S2.** Transcriptional analysis of six conidiation related genes. The expression level of six conidiation related genes in Guy11 and  $\Delta Moma1$  mutant. Error bars represent  $\pm$ SD and asterisks represent significant differences ( $p < 0.01$ ).

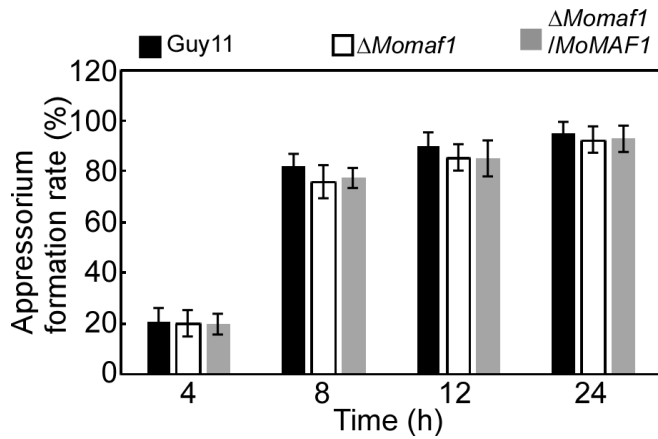

**Figure S3.** Statistical analysis of the appressorium formation observed at 4, 8, 12 and 24 h time point. Error bars represent the standard deviations. Asterisks represent significant differences ( $p < 0.01$ ).

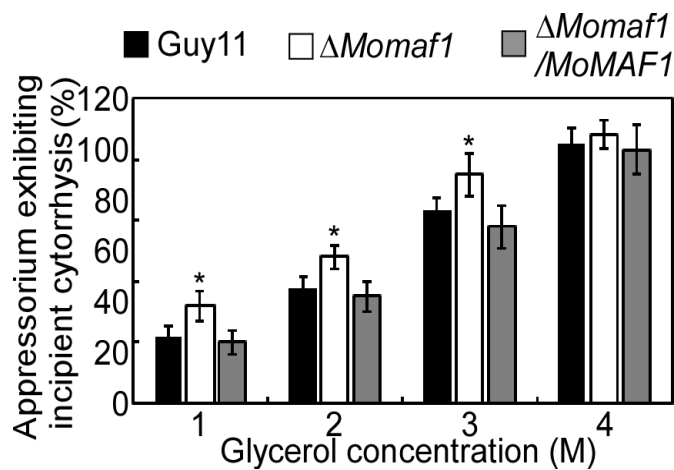

**Figure S4.** MoMaf1 is involved in appressorium turgor generation. Statistical analysis of the collapsed appressoria on hydrophobic surfaces after 24 h incubation. Error bars represent  $\pm$ SD and asterisks represent significant differences ( $p < 0.01$ ).

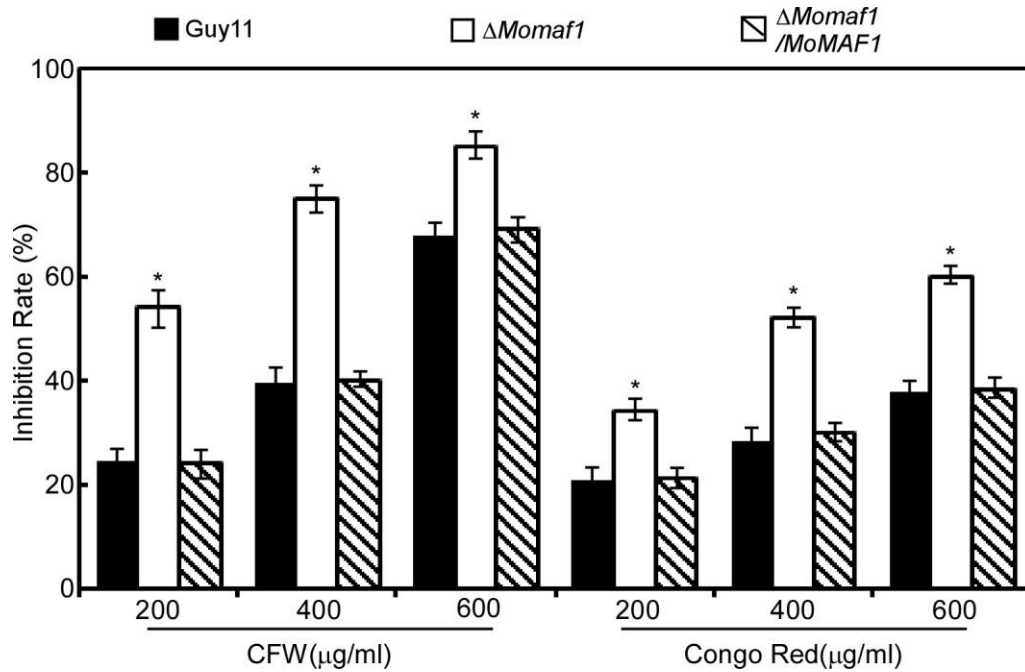

**Figure S5.** MoMaf1 is involved in cell wall stress response. Guy11,  $\Delta Moma1$  mutant, and  $\Delta Moma1/MoMAF1$  were incubated on CM plates containing different concentrations of Congo Red (CR) and CFW at 28 C for 7 days. The inhibition rate was determined by plotting the percentage of colonies in the presence of various concentrations of CR and CFW against regular CM. Error bars represent  $\pm$ SD and asterisks represent significant differences ( $p < 0.01$ ).
